# Supplementary material for: Impact of Reducing Synthetic Chemical Inputs on Pest and Disease Management in Commercial Onion Production Systems
Source: MDPI journal article supplement (doi:10.3390/agronomy12061292), 2022-05-28
Supplement: s1 [file s1]

## **Supplementary materials**

### **Impact of reducing synthetic chemical inputs on pest and disease management in commercial onion production systems**

Karly H. Regan<sup>a</sup>, Brian A. Nault<sup>a, \*</sup>

*<sup>a</sup> Department of Entomology, Cornell University, Cornell AgriTech, 15 Castle Creek Dr.,  
Geneva, NY 14456*

**Corresponding Author:** \*Brian A. Nault

*Address: Department of Entomology, Cornell University, Cornell AgriTech, 15 Castle Creek Dr.,  
Geneva, NY 14456*

Email: [ban6@cornell.edu](mailto:ban6@cornell.edu)

Phone: (315) 787-2354

## Contents:

**Table S1.** Locations, cultivars, planting and harvest dates for all onion fields sampled in New York (USA) in 2019, 2020, and 2021. All field locations differed each year.

**Table S2.** Amount of synthetic N-P-K fertilizer ( $\text{kg ha}^{-1}$ ) applied in each onion field at planting each year, as well as the rates recommended by the 2019 Cornell Integrated Crop and Pest Management Guidelines for Commercial Vegetable Production for growing dry bulb onions on muck soils in New York (USA). All field locations differed each year.

**Table S3.** Example composition of typical fertilizer mix that onion growers order custom-blended based on soil test results.

**Table S4.** Insecticides and rates applied in all onion fields in this study, including those made following an action threshold-based spray program and the additional sprays made in the weekly spray program in New York (USA) in 2019, 2020, and 2021.

**Table S5** Summary ANOVA table of soil nutrient levels in the portions of all onion fields that received half and full application rates of N-P-K fertilizer compared with zero fertilizer applied in New York (USA) in 2019, 2020, and 2021.

**Table S6.** Mean temperature and mean total precipitation in the two general regions where our study was conducted in New York (USA) in 2019, 2020, and 2021.

**Figure S1.** Nutrient levels from muck soil sampled in onion fields in July 2019 (A), May 2020 (B), July 2020 (C), May 2021 (D) and June 2021 (E) in New York (USA). Results are illustrated as the percent difference in nutrients from sample transects where no fertilizer was applied to those receiving either a half or full rate of N-P-K fertilizer applied. Error bars represent standard error. No differences were detected between half and full rates of fertilizer for any nutrient in this study (2019-2021).

**Table S1.** Locations, cultivars, planting and harvest dates for all onion fields sampled in New York (USA) in 2019, 2020, and 2021. All field locations differed each year.

| Year | Location    |                           |           |                  |               |              |
|------|-------------|---------------------------|-----------|------------------|---------------|--------------|
| 2019 | Orleans Co. | GPS coordinates           | Cultivar  | Days to Maturity | Planting Date | Harvest Date |
|      | Field 1     | 43°09'15.3"N 78°06'42.2"W | Bradley   | 118              | 16-Apr        | 9-Sep        |
|      | Field 2     | 43°08'20.7"N 78°06'40.6"W | Montclair | 112              | 15-Apr        | 4-Sep        |
|      | Field 3     | 43°07'53.1"N 78°06'53.4"W | Bradley   | 118              | 13-Apr        | 4-Sep        |
|      | Field 4     | 43°07'58.6"N 78°07'05.5"W | Crockett  | 118              | 17-Apr        | 9-Sep        |
| 2020 | Orleans Co. |                           |           |                  |               |              |
|      | Field 1     | 43°08'20.9"N 78°06'37.4"W | Montclair | 112              | 20-Apr        | 8-Sep        |
|      | Field 2     | 43°09'16.7"N 78°06'37.8"W | Safrane   | 106              | 29-Apr        | 8-Sep        |
|      | Field 3     | 43°08'03.9"N 78°06'45.3"W | Bradley   | 118              | 21-Apr        | 8-Sep        |
|      | Field 4     | 43°07'58.9"N 78°07'05.7"W | Crockett  | 118              | 2-Apr         | 8-Sep        |
|      | Field 5     | 43°08'42.6"N 78°06'33.3"W | Hamilton  | 120              | 7-Apr         | 8-Sep        |
|      | Wayne Co.   |                           |           |                  |               |              |
|      | Field 6     | 43°13'24.6"N 77°04'21.3"W | Safrane   | 106              | 8-May         | 1-Sep        |
|      | Field 7     | 43°10'08.0"N 77°03'52.9"W | Fortress  | 110              | 29-Apr        | 1-Sep        |
|      | Field 8     | 43°10'05.8"N 77°03'57.7"W | Safrane   | 106              | 29-Apr        | 1-Sep        |
| 2021 | Orleans Co. |                           |           |                  |               |              |
|      | Field 1     | 43°07'58.9"N 78°07'05.7"W | Crockett  | 118              | 6-Apr         | 1-Sep        |
|      | Field 2     | 43°08'41.9"N 78°06'35.0"W | Hamilton  | 120              | 8-Apr         | 1-Sep        |
|      | Field 3     | 43°08'21.8"N 78°06'42.2"W | Montclair | 112              | 7-Apr         | 1-Sep        |
|      | Field 4     | 43°09'16.8"N 78°06'35.2"W | Safrane   | 106              | 10-Apr        | 1-Sep        |
|      | Field 5     | 43°08'37.5"N 78°07'44.0"W | Bradley   | 118              | 31-Mar        | 1-Sep        |
|      | Wayne Co.   |                           |           |                  |               |              |
|      | Field 6     | 43°08'19.7"N 77°04'31.4"W | Safrane   | 106              | 26-Apr        | 27-Aug       |
|      | Field 7     | 43°09'32.3"N 77°03'40.9"W | Stanley   | 110              | 23-Apr        | 19-Aug       |
|      | Field 8     | 43°09'32.3"N 77°03'41.6"W | Fortress  | 110              | 24-Apr        | 19-Aug       |

**Table S2.** Amount of synthetic N-P-K fertilizer applied in each onion field at planting each year, as well as the rates recommended by the 2019 Cornell Integrated Crop and Pest Management Guidelines for Commercial Vegetable Production for growing dry bulb onions on muck soils in New York (USA). All field locations differed each year.

| Year | Location | Nitrogen (kg ha <sup>-1</sup> ) |      | Phosphorus (kg ha <sup>-1</sup> ) |      | Potassium (kg ha <sup>-1</sup> ) |      |
|------|----------|---------------------------------|------|-----------------------------------|------|----------------------------------|------|
|      |          | Half                            | Full | Half                              | Full | Half                             | Full |
| 2019 | Field 1  | 70                              | 140  | 78                                | 156  | 81                               | 162  |
|      | Field 2  | 70                              | 140  | 78                                | 156  | 81                               | 162  |
|      | Field 3  | 62                              | 125  | 56                                | 112  | 85                               | 170  |
|      | Field 4  | 50                              | 100  | 84                                | 168  | 112                              | 224  |
| 2020 | Field 1  | 67                              | 134  | 63                                | 126  | 63                               | 126  |
|      | Field 2  | 67                              | 134  | 63                                | 126  | 63                               | 126  |
|      | Field 3  | 63                              | 126  | 57                                | 113  | 85                               | 169  |
|      | Field 4  | 50                              | 101  | 84                                | 168  | 112                              | 224  |
|      | Field 5  | 50                              | 101  | 84                                | 168  | 112                              | 224  |
|      | Field 6  | 51                              | 102  | 38                                | 76   | 110                              | 220  |
|      | Field 7  | 50                              | 100  | 38                                | 76   | 139                              | 277  |
|      | Field 8  | 50                              | 100  | 38                                | 76   | 139                              | 277  |
| 2021 | Field 1  | 67                              | 134  | 63                                | 126  | 63                               | 126  |
|      | Field 2  | 67                              | 134  | 63                                | 126  | 63                               | 126  |
|      | Field 3  | 63                              | 126  | 57                                | 113  | 85                               | 169  |
|      | Field 4  | 73                              | 146  | 84                                | 168  | 112                              | 224  |
|      | Field 5  | 73                              | 146  | 84                                | 168  | 112                              | 224  |
|      | Field 6  | 51                              | 102  | 38                                | 76   | 110                              | 220  |
|      | Field 7  | 50                              | 100  | 38                                | 76   | 139                              | 277  |
|      | Field 8  | 50                              | 100  | 38                                | 76   | 139                              | 277  |

Recommended rates of N are 112 to 140 kg ha<sup>-1</sup>; P are 56 to 168 kg ha<sup>-1</sup>; K are 56 to 168 kg ha<sup>-1</sup>.

**Table S3.** Example composition of typical fertilizer mix that onion growers order custom-blended based on soil test results.

| Ingredient Name        | Composition                           | Amount in Mixture (kg) |
|------------------------|---------------------------------------|------------------------|
| Copper                 | 0-0-0-12Cu                            | 22.7                   |
| Manganese Oxy-Sulfate  | 0-0-0-18.5S-32Mn                      | 22.7                   |
| Ammonium Sulfate       | 12-0-0-24S                            | 121.6                  |
| K-Mag                  | 0-0-22-22S                            | 127                    |
| Monoammonium Phosphate | 11-52-0                               | 244.9                  |
| Potassium Chloride     | 0-0-60                                | 172.4                  |
| Urea                   | 44-0-0                                | 196                    |
| Final Mixture          | 15N-14P-14K-6.8S-0.3Cu-0.675Mn-0.15Zn | 907.2                  |

**Table S4.** Insecticides and rates applied in all onion fields in this study, including those made following an action threshold-based spray program and the additional sprays made in the weekly spray program in New York (USA) in 2019, 2020, and 2021.

| Year | County  | Location | Application Date | Action Threshold Treatment |                   |            |                                    | Weekly Treatment |                   |             |                                    |
|------|---------|----------|------------------|----------------------------|-------------------|------------|------------------------------------|------------------|-------------------|-------------|------------------------------------|
|      |         |          |                  | IRAC MOA                   | Active ingredient | Trade Name | Amt. Applied (g ha <sup>-1</sup> ) | IRAC MOA         | Active ingredient | Trade Name  | Amt. Applied (g ha <sup>-1</sup> ) |
| 2019 | Orleans | Field 1  | 10-Jul           | 23                         | Spirotetramat     | Movento    | 87.6                               | 23               | Spirotetramat     | Movento     | 87.6                               |
|      |         |          | 18-Jul           | 23                         | Spirotetramat     | Movento    | 87.6                               | 23               | Spirotetramat     | Movento     | 87.6                               |
|      |         |          | 25-Jul           |                            |                   | ---        |                                    | 6                | Abamectin         | Agri-Mek SC | 21.4                               |
|      |         |          | 2-Aug            | 5                          | Spinetoram        | Radiant SC | 87.6                               | 5                | Spinetoram        | Radiant SC  | 87.6                               |
|      |         |          | 8-Aug            |                            |                   | ---        |                                    | 5                | Spinetoram        | Radiant SC  | 70.0                               |
|      |         |          | 15-Aug           | 5                          | Spinetoram        | Radiant SC | 70.0                               | 5                | Spinetoram        | Radiant SC  | 70.0                               |
|      |         |          | 23-Aug           | 28                         | Cyantraniliprole  | Exirel     | 116.2                              | 28               | Cyantraniliprole  | Exirel      | 116.2                              |
|      |         |          | 29-Aug           | 28                         | Cyantraniliprole  | Exirel     | 116.2                              | 28               | Cyantraniliprole  | Exirel      | 116.2                              |
|      |         | Field 2  | 10-Jul           | 23                         | Spirotetramat     | Movento    | 87.6                               | 23               | Spirotetramat     | Movento     | 87.6                               |
|      |         |          | 18-Jul           | 23                         | Spirotetramat     | Movento    | 87.6                               | 23               | Spirotetramat     | Movento     | 87.6                               |
|      |         |          | 25-Jul           |                            |                   | ---        |                                    | 6                | Abamectin         | Agri-Mek SC | 21.4                               |
|      |         |          | 1-Aug            | 5                          | Spinetoram        | Radiant SC | 87.6                               | 5                | Spinetoram        | Radiant SC  | 87.6                               |
|      |         |          | 8-Aug            |                            |                   | ---        |                                    | 5                | Spinetoram        | Radiant SC  | 70.0                               |
|      |         |          | 15-Aug           | 5                          | Spinetoram        | Radiant SC | 70.0                               | 5                | Spinetoram        | Radiant SC  | 70.0                               |
|      |         |          | 23-Aug           |                            |                   | ---        |                                    | 28               | Cyantraniliprole  | Exirel      | 116.2                              |
|      |         | Field 3  | 4-Jul            | 23                         | Spirotetramat     | Movento    | 87.6                               | 23               | Spirotetramat     | Movento     | 87.6                               |
|      |         |          | 15-Jul           | 23                         | Spirotetramat     | Movento    | 87.6                               | 23               | Spirotetramat     | Movento     | 87.6                               |
|      |         |          | 23-Jul           |                            |                   | ---        |                                    | 6                | Abamectin         | Agri-Mek SC | 21.4                               |
|      |         |          | 30-Jul           |                            |                   | ---        |                                    | 6                | Abamectin         | Agri-Mek SC | 21.4                               |
|      |         |          | 8-Aug            | 28                         | Cyantraniliprole  | Exirel     | 98.1                               | 28               | Cyantraniliprole  | Exirel      | 98.1                               |

|         |         |         |        |        |                                 |             |             |         |                                      |                                             |               |
|---------|---------|---------|--------|--------|---------------------------------|-------------|-------------|---------|--------------------------------------|---------------------------------------------|---------------|
|         |         |         | 16-Aug | 5      | Spinetoram                      | Radiant SC  | 70.0        | 5       | Spinetoram                           | Radiant SC                                  | 70.0          |
|         |         |         | 23-Aug | 5      | Spinetoram                      | Radiant SC  | 70.0        | 5       | Spinetoram                           | Radiant SC                                  | 70.0          |
|         |         |         |        |        |                                 |             |             |         |                                      |                                             |               |
| Field 4 |         |         | 3-Jul  | 23     | Spirotetramat                   | Movento     | 87.6        | 23      | Spirotetramat                        | Movento                                     | 87.6          |
|         |         |         | 11-Jul | 23     | Spirotetramat                   | Movento     | 87.6        | 23      | Spirotetramat                        | Movento                                     | 87.6          |
|         |         |         | 18-Jul |        |                                 | ---         |             | 6       | Abamectin                            | Agri-Mek SC                                 | 21.4          |
|         |         |         | 25-Jul |        |                                 | ---         |             | 6       | Abamectin                            | Agri-Mek SC                                 | 21.4          |
|         |         |         | 30-Jul |        |                                 | ---         |             | 28      | Cyantraniliprole                     | Exirel                                      | 98.1          |
|         |         |         | 7-Aug  | 28     | Cyantraniliprole                | Exirel      | 98.1        | 28      | Cyantraniliprole                     | Exirel                                      | 98.1          |
|         |         |         | 16-Aug |        |                                 | ---         |             | 5       | Spinetoram                           | Radiant SC                                  | 70.0          |
|         |         |         | 23-Aug |        |                                 | ---         |             | 5       | Spinetoram                           | Radiant SC                                  | 70.0          |
|         |         |         |        |        |                                 |             |             |         |                                      |                                             |               |
| 2020    | Orleans | Field 1 | 9-Jul  | 23     | Spirotetramat                   | Movento     | 87.6        | 23      | Spirotetramat                        | Movento                                     | 87.6          |
|         |         |         | 16-Jul | 23     | Spirotetramat                   | Movento     | 87.6        | 23      | Spirotetramat                        | Movento                                     | 87.6          |
|         |         |         | 23-Jul | 6 + 28 | Abamectin +<br>Cyantraniliprole | Minecto Pro | 14.7 + 69.3 | 6 + 28  | Abamectin +<br>Cyantraniliprole      | Minecto Pro                                 | 14.7 + 69.3   |
|         |         |         | 31-Jul |        |                                 | ---         |             | 1A + 3A | Methomyl +<br>Lambda-<br>cyhalothrin | Lannate LV +<br>Warrior II w/<br>zeon tech. | 1008.6 + 34.6 |
|         |         |         | 6-Aug  |        |                                 | ---         |             | 28      | Cyantraniliprole                     | Exirel                                      | 98.1          |
|         |         |         | 13-Aug | 5      | Spinetoram                      | Radiant     | 87.6        | 5       | Spinetoram                           | Radiant SC                                  | 87.6          |
|         |         |         | 20-Aug | 6 + 28 | Abamectin +<br>Cyantraniliprole | Minecto Pro | 14.7 + 69.3 | 6 + 28  | Abamectin +<br>Cyantraniliprole      | Minecto Pro                                 | 14.7 + 69.3   |
|         |         |         |        |        |                                 |             |             |         |                                      |                                             |               |
|         |         | Field 2 | 9-Jul  | 23     | Spirotetramat                   | Movento     | 87.6        | 23      | Spirotetramat                        | Movento                                     | 87.6          |
|         |         |         | 16-Jul | 23     | Spirotetramat                   | Movento     | 87.6        | 23      | Spirotetramat                        | Movento                                     | 87.6          |
|         |         |         | 24-Jul |        |                                 | ---         |             | 1A + 3A | Methomyl +<br>Lambda-<br>cyhalothrin | Lannate LV +<br>Warrior II w/<br>zeon tech. | 1008.6 + 34.6 |

|         |        |        |                                       |                               |             |         |                                       |                                             |               |
|---------|--------|--------|---------------------------------------|-------------------------------|-------------|---------|---------------------------------------|---------------------------------------------|---------------|
|         | 30-Jul | 6 + 28 | Abamectin +<br>Cyantraniliprole       | Minecto Pro                   | 14.7 + 69.3 | 6 + 28  | Abamectin +<br>Cyantraniliprole       | Minecto Pro                                 | 14.7 + 69.3   |
|         | 6-Aug  | 5      | Spinetoram                            | Radiant SC                    | 87.6        | 5       | Spinetoram                            | Radiant SC                                  | 87.6          |
|         | 13-Aug | 5      | Spinetoram                            | Radiant SC                    | 87.6        | 5       | Spinetoram                            | Radiant SC                                  | 87.6          |
|         | 20-Aug | 6 + 28 | Abamectin +<br>Cyantraniliprole       | Minecto Pro                   | 14.7 + 69.3 | 6 + 28  | Abamectin +<br>Cyantraniliprole       | Minecto Pro                                 | 14.7 + 69.3   |
| Field 3 | 10-Jul | 23     | Spirotetramat                         | Movento                       | 87.6        | 23      | Spirotetramat                         | Movento                                     | 87.6          |
|         | 20-Jul | 23     | Spirotetramat                         | Movento                       | 87.6        | 23      | Spirotetramat                         | Movento                                     | 87.6          |
|         | 31-Jul | ---    |                                       |                               |             | 6       | Abamectin                             | Agri-Mek SC                                 | 21.4          |
|         | 6-Aug  | 5      | Spinetoram                            | Radiant SC                    | 70.0        | 5       | Spinetoram                            | Radiant SC                                  | 70.0          |
|         | 13-Aug | 5      | Spinetoram                            | Radiant SC                    | 70.0        | 5       | Spinetoram                            | Radiant SC                                  | 70.0          |
| Field 4 | 6-Jul  | 23     | Spirotetramat                         | Movento                       | 87.6        | 23      | Spirotetramat                         | Movento                                     | 87.6          |
|         | 13-Jul | 23     | Spirotetramat                         | Movento                       | 87.6        | 23      | Spirotetramat                         | Movento                                     | 87.6          |
|         | 20-Jul | 6 + 3A | Abamectin +<br>Lambda-<br>cyhalothrin | Agri-Mek<br>SC +<br>Lamcap II | 21.4 + 35.6 | 6 + 3A  | Abamectin +<br>Lambda-<br>cyhalothrin | Agri-Mek SC +<br>Lamcap II                  | 21.4 + 35.6   |
|         | 27-Jul | 5      | Spinetoram                            | Radiant SC                    | 87.6        | 5       | Spinetoram                            | Radiant SC                                  | 87.6          |
|         | 5-Aug  | 5      | Spinetoram                            | Radiant SC                    | 87.6        | 5       | Spinetoram                            | Radiant SC                                  | 87.6          |
|         | 12-Aug | 6 + 28 | Abamectin +<br>Cyantraniliprole       | Minecto Pro                   | 14.7 + 69.3 | 6 + 28  | Abamectin +<br>Cyantraniliprole       | Minecto Pro                                 | 14.7 + 69.3   |
|         | 20-Aug |        |                                       | ---                           |             | 1A + 3A | Methomyl +<br>Lambda-<br>cyhalothrin  | Lannate LV +<br>Warrior II w/<br>zeon tech. | 1008.6 + 34.6 |
|         | 24-Aug | 5      | Spinetoram                            | Radiant SC                    | 70.0        | 5       | Spinetoram                            | Radiant SC                                  | 70.0          |
| Field 5 | 6-Jul  | 23     | Spirotetramat                         | Movento                       | 87.6        | 23      | Spirotetramat                         | Movento                                     | 87.6          |



|        |        |                                       |                               |             |         |                                       |                                            |               |
|--------|--------|---------------------------------------|-------------------------------|-------------|---------|---------------------------------------|--------------------------------------------|---------------|
| 13-Jul | 23     | Spirotetramat                         | Movento                       | 87.6        | 23      | Spirotetramat                         | Movento                                    | 87.6          |
| 20-Jul | 6 + 3A | Abamectin +<br>Lambda-<br>cyhalothrin | Agri-Mek<br>SC +<br>Lamcap II | 21.4 + 35.6 | 6 + 3A  | Abamectin +<br>Lambda-<br>cyhalothrin | Agri-Mek SC +<br>Lamcap II                 | 21.4 + 35.6   |
| 27-Jul | 5      | Spinetoram                            | Radiant                       | 87.6        | 5       | Spinetoram                            | Radiant SC                                 | 87.6          |
| 5-Aug  | 5      | Spinetoram                            | Radiant                       | 87.6        | 5       | Spinetoram                            | Radiant SC                                 | 87.6          |
| 12-Aug | 6 + 28 | Abamectin +<br>Cyantraniliprole       | Minecto Pro                   | 14.7 + 69.3 | 6 + 28  | Abamectin +<br>Cyantraniliprole       | Minecto Pro                                | 14.7 + 69.3   |
| 20-Aug |        |                                       | ---                           |             | 1A + 3A | Methomyl +<br>Lambda-<br>cyhalothrin  | Lannate LV +<br>Warrior II<br>w/zeon tech. | 1008.6 + 34.6 |
| 24-Aug | 5      | Spinetoram                            | Radiant SC                    | 70.0        | 5       | Spinetoram                            | Radiant SC                                 | 70.0          |

|       |         |        |        |                                 |             |             |         |                                      |                                             |               |
|-------|---------|--------|--------|---------------------------------|-------------|-------------|---------|--------------------------------------|---------------------------------------------|---------------|
| Wayne | Field 6 | 26-Jun | 23     | Spirotetramat                   | Movento     | 87.6        | 23      | Spirotetramat                        | Movento                                     | 87.6          |
|       |         | 4-Jul  | 23     | Spirotetramat                   | Movento     | 87.6        | 23      | Spirotetramat                        | Movento                                     | 87.6          |
|       |         | 9-Jul  |        |                                 | ---         |             | 1A + 3A | Methomyl +<br>Lambda-<br>cyhalothrin | Lannate LV +<br>Warrior II w/<br>zeon tech. | 1008.6 + 34.6 |
|       |         | 25-Jul | 6      | Abamectin                       | Reaper      | 21.0        | 6       | Abamectin                            | Reaper                                      | 21.0          |
|       |         | 31-Jul | 6 + 28 | Abamectin +<br>Cyantraniliprole | Minecto Pro | 14.7 + 69.3 | 6 + 28  | Abamectin +<br>Cyantraniliprole      | Minecto Pro                                 | 14.7 + 69.3   |
|       |         | 7-Aug  | 5      | Spinetoram                      | Radiant SC  | 70.0        | 5       | Spinetoram                           | Radiant SC                                  | 70.0          |
|       |         | 14-Aug | 5      | Spinetoram                      | Radiant SC  | 70.0        | 5       | Spinetoram                           | Radiant SC                                  | 70.0          |
|       |         | 22-Aug | 5      | Spinetoram                      | Radiant SC  | 70.0        | 5       | Spinetoram                           | Radiant SC                                  | 70.0          |
|       |         |        |        |                                 |             |             |         |                                      |                                             |               |
|       | Field 7 | 26-Jun | 23     | Spirotetramat                   | Movento     | 87.6        | 23      | Spirotetramat                        | Movento                                     | 87.6          |
|       |         | 3-Jul  | 23     | Spirotetramat                   | Movento     | 87.6        | 23      | Spirotetramat                        | Movento                                     | 87.6          |

|         |         |         |        |                                 |               |             |         |                                      |                                             |               |
|---------|---------|---------|--------|---------------------------------|---------------|-------------|---------|--------------------------------------|---------------------------------------------|---------------|
|         |         |         |        |                                 |               |             | 1A + 3A | Methomyl +<br>Lambda-<br>cyhalothrin | Lannate LV +<br>Warrior II w/<br>zeon tech. | 1008.6 + 34.6 |
|         |         |         |        |                                 |               |             | 1A + 3A | Methomyl +<br>Lambda-<br>cyhalothrin | Lannate LV +<br>Warrior II w/<br>zeon tech. | 1008.6 + 34.6 |
|         |         | 24-Jul  | 6 + 28 | Abamectin +<br>Cyantraniliprole | Minecto Pro   | 14.7 + 69.3 | 6 + 28  | Abamectin +<br>Cyantraniliprole      | Minecto Pro                                 | 14.7 + 69.3   |
|         |         | 31-Jul  |        |                                 | ---           |             | 6       | Abamectin                            | Agri-Mek SC                                 | 21.4          |
|         |         | 5-Aug   | 5      | Spinetoram                      | Radiant SC    | 87.6        | 5       | Spinetoram                           | Radiant SC                                  | 87.6          |
|         |         | 12-Aug  | 5      | Spinetoram                      | Radiant SC    | 87.6        | 5       | Spinetoram                           | Radiant SC                                  | 87.6          |
| Field 8 |         | 26-Jun  | 23     | Spirotetramat                   | Movento       | 87.6        | 23      | Spirotetramat                        | Movento                                     | 87.6          |
|         |         | 3-Jul   | 23     | Spirotetramat                   | Movento       | 87.6        | 23      | Spirotetramat                        | Movento                                     | 87.6          |
|         |         | 9-Jul   |        |                                 | ---           |             | 1A + 3A | Methomyl +<br>Lambda-<br>cyhalothrin | Lannate LV +<br>Warrior II w/<br>zeon tech. | 1008.6 + 34.6 |
|         |         | 17-Jul  |        |                                 | ---           |             | 1A + 3A | Methomyl +<br>Lambda-<br>cyhalothrin | Lannate LV +<br>Warrior II w/<br>zeon tech. | 1008.6 + 34.6 |
|         |         | 24-Jul  | 6 + 28 | Abamectin +<br>Cyantraniliprole | Minecto Pro   | 14.7 + 69.3 | 6 + 28  | Abamectin +<br>Cyantraniliprole      | Minecto Pro                                 | 14.7 + 69.3   |
|         |         | 31-Jul  |        |                                 | ---           |             | 6       | Abamectin                            | Agri-Mek SC                                 | 21.4          |
|         |         | 5-Aug   | 5      | Spinetoram                      | Radiant SC    | 87.6        | 5       | Spinetoram                           | Radiant SC                                  | 87.6          |
|         |         | 12-Aug  | 5      | Spinetoram                      | Radiant SC    | 87.6        | 5       | Spinetoram                           | Radiant SC                                  | 87.6          |
|         |         |         |        |                                 |               |             |         |                                      |                                             |               |
|         |         |         |        |                                 |               |             |         |                                      |                                             |               |
| 2021    | Orleans | Field 1 | 9-Jun  | 23                              | Spirotetramat | Movento     | 23      | Spirotetramat                        | Movento                                     | 87.6          |
|         |         |         | 16-Jun | 23                              | Spirotetramat | Movento     | 23      | Spirotetramat                        | Movento                                     | 87.6          |

|         |        |        |                                 |             |             |         |                                       |                                             |               |
|---------|--------|--------|---------------------------------|-------------|-------------|---------|---------------------------------------|---------------------------------------------|---------------|
|         | 23-Jun |        | ---                             |             |             | 1A + 3A | Methomyl +<br>Lambda-<br>cyhalothrin  | Lannate LV +<br>Warrior II w/<br>zeon tech. | 1008.6 + 34.6 |
|         | 30-Jun | 6 + 28 | Abamectin +<br>Cyantraniliprole | Minecto Pro | 14.7 + 69.3 | 6 + 28  | Abamectin +<br>Cyantraniliprole       | Minecto Pro                                 | 14.7 + 69.3   |
|         | 8-Jul  | 6 + 28 | Abamectin +<br>Cyantraniliprole | Minecto Pro | 14.7 + 69.3 | 6 + 28  | Abamectin +<br>Cyantraniliprole       | Minecto Pro                                 | 14.7 + 69.3   |
|         | 14-Jul | 5      | Spinetoram                      | Radiant SC  | 70.0        | 5       | Spinetoram                            | Radiant SC                                  | 70.0          |
|         | 21-Jul |        | ---                             |             |             | 6 + 3A  | Abamectin +<br>Lambda-<br>cyhalothrin | Agri-Mek SC +<br>Warrior II<br>w/zeon tech. | 21.4 + 35.0   |
|         | 28-Jul | 5      | Spinetoram                      | Radiant SC  | 87.6        | 5       | Spinetoram                            | Radiant SC                                  | 87.6          |
|         | 4-Aug  | 5      | Spinetoram                      | Radiant SC  | 87.6        | 5       | Spinetoram                            | Radiant SC                                  | 87.6          |
|         | 11-Aug | 28     | Cyantraniliprole                | Exirel      | 145.3       | 28      | Cyantraniliprole                      | Exirel                                      | 145.3         |
|         | 20-Aug | 28     | Cyantraniliprole                | Exirel      | 98.1        | 28      | Cyantraniliprole                      | Exirel                                      | 98.1          |
| Field 2 | 21-Jun | 23     | Spirotetramat                   | Movento     | 87.6        | 23      | Spirotetramat                         | Movento                                     | 87.6          |
|         | 28-Jun | 23     | Spirotetramat                   | Movento     | 87.6        | 23      | Spirotetramat                         | Movento                                     | 87.6          |
|         | 7-Jul  |        | ---                             |             |             | 1A + 3A | Methomyl +<br>Lambda-<br>cyhalothrin  | Lannate LV +<br>Warrior II w/<br>zeon tech. | 1008.6 + 34.6 |
|         | 15-Jul | 6 + 28 | Abamectin +<br>Cyantraniliprole | Minecto Pro | 14.7 + 69.3 | 6 + 28  | Abamectin +<br>Cyantraniliprole       | Minecto Pro                                 | 14.7 + 69.3   |
|         | 21-Jul |        | ---                             |             |             | 1A + 3A | Methomyl +<br>Lambda-<br>cyhalothrin  | Lannate LV +<br>Warrior II w/<br>zeon tech. | 1008.6 + 34.6 |
|         | 28-Jul | 6 + 28 | Abamectin +<br>Cyantraniliprole | Minecto Pro | 14.7 + 69.3 | 6 + 28  | Abamectin +<br>Cyantraniliprole       | Minecto Pro                                 | 14.7 + 69.3   |
|         | 4-Aug  | 5      | Spinetoram                      | Radiant SC  | 87.6        | 5       | Spinetoram                            | Radiant SC                                  | 87.6          |

|         |        |        |                                 |             |             |         |                                       |                                             |               |
|---------|--------|--------|---------------------------------|-------------|-------------|---------|---------------------------------------|---------------------------------------------|---------------|
|         | 11-Aug | 5      | Spinetoram                      | Radiant SC  | 87.6        | 5       | Spinetoram                            | Radiant SC                                  | 87.6          |
|         | 20-Aug | 28     | Cyantraniliprole                | Exirel      | 98.1        | 28      | Cyantraniliprole                      | Exirel                                      | 98.1          |
| Field 3 | 10-Jun | 23     | Spirotetramat                   | Movento     | 87.6        | 23      | Spirotetramat                         | Movento                                     | 87.6          |
|         | 17-Jun | 23     | Spirotetramat                   | Movento     | 87.6        | 23      | Spirotetramat                         | Movento                                     | 87.6          |
|         | 23-Jun |        | ---                             |             |             | 1A + 3A | Methomyl +<br>Lambda-<br>cyhalothrin  | Lannate LV +<br>Warrior II w/<br>zeon tech. | 1008.6 + 34.6 |
|         |        |        |                                 |             |             |         | Methomyl +<br>Lambda-<br>cyhalothrin  | Lannate LV +<br>Warrior II w/<br>zeon tech. |               |
|         | 30-Jun |        |                                 |             |             | 1A + 3A |                                       |                                             |               |
|         | 10-Jul | 6 + 28 | Abamectin +<br>Cyantraniliprole | Minecto Pro | 14.7 + 69.3 | 6 + 28  | Abamectin +<br>Cyantraniliprole       | Minecto Pro                                 | 14.7 + 69.3   |
|         |        | 6 + 28 | Abamectin +<br>Cyantraniliprole | Minecto Pro | 14.7 + 69.3 | 6 + 28  | Abamectin +<br>Cyantraniliprole       | Minecto Pro                                 | 14.7 + 69.3   |
|         | 15-Jul |        |                                 |             |             |         |                                       |                                             |               |
|         | 21-Jul |        | ---                             |             |             | 6 + 3A  | Abamectin +<br>Lambda-<br>cyhalothrin | Agri-Mek SC +<br>Warrior II<br>w/zeon tech. | 21.4 + 35.0   |
|         |        |        |                                 |             |             |         |                                       |                                             |               |
|         | 29-Jul | 5      | Spinetoram                      | Radiant SC  | 87.6        | 5       | Spinetoram                            | Radiant SC                                  | 87.6          |
|         | 6-Aug  | 5      | Spinetoram                      | Radiant SC  | 87.6        | 5       | Spinetoram                            | Radiant SC                                  | 87.6          |
|         | 12-Aug | 28     | Cyantraniliprole                | Exirel      | 116.3       | 28      | Cyantraniliprole                      | Exirel                                      | 116.3         |
|         | 20-Aug | 28     | Cyantraniliprole                | Exirel      | 145.3       | 28      | Cyantraniliprole                      | Exirel                                      | 145.3         |
| Field 4 | 10-Jun | 23     | Spirotetramat                   | Movento     | 87.6        | 23      | Spirotetramat                         | Movento                                     | 87.6          |
|         | 17-Jun | 23     | Spirotetramat                   | Movento     | 87.6        | 23      | Spirotetramat                         | Movento                                     | 87.6          |
|         | 23-Jun |        | ---                             |             |             | 1A + 3A | Methomyl +<br>Lambda-<br>cyhalothrin  | Lannate LV +<br>Warrior II w/<br>zeon tech. | 1008.6 + 34.6 |
|         |        |        |                                 |             |             |         |                                       |                                             |               |

|         |        |        |                                 |                |             |         |                                       |                                             |               |
|---------|--------|--------|---------------------------------|----------------|-------------|---------|---------------------------------------|---------------------------------------------|---------------|
|         |        |        | ---                             |                |             | 1A + 3A | Methomyl +<br>Lambda-<br>cyhalothrin  | Lannate LV +<br>Warrior II w/<br>zeon tech. | 1008.6 + 34.6 |
|         | 30-Jun |        |                                 |                |             |         |                                       |                                             |               |
|         | 10-Jul | 6 + 28 | Abamectin +<br>Cyantraniliprole | Minecto Pro    | 14.7 + 69.3 | 6 + 28  | Abamectin +<br>Cyantraniliprole       | Minecto Pro                                 | 14.7 + 69.3   |
|         | 15-Jul | 6 + 28 | Abamectin +<br>Cyantraniliprole | Minecto Pro    | 14.7 + 69.3 | 6 + 28  | Abamectin +<br>Cyantraniliprole       | Minecto Pro                                 | 14.7 + 69.3   |
|         |        |        |                                 |                |             |         |                                       |                                             |               |
|         |        |        |                                 |                |             | 6 + 3A  | Abamectin +<br>Lambda-<br>cyhalothrin | Agri-Mek SC +<br>Warrior II<br>w/zeon tech. | 21.4 + 35.0   |
|         | 21-Jul |        |                                 |                |             |         |                                       |                                             |               |
|         | 29-Jul | 5      | Spinetoram                      | Radiant SC     | 87.6        | 5       | Spinetoram                            | Radiant SC                                  | 87.6          |
|         | 5-Aug  | 5      | Spinetoram                      | Radiant SC     | 87.6        | 5       | Spinetoram                            | Radiant SC                                  | 87.6          |
|         | 12-Aug | 28     | Cyantraniliprole                | Exirel         | 116.3       | 28      | Cyantraniliprole                      | Exirel                                      | 116.3         |
|         | 20-Aug | 28     | Cyantraniliprole                | Exirel         | 145.3       | 28      | Cyantraniliprole                      | Exirel                                      | 145.3         |
| <hr/>   |        |        |                                 |                |             |         |                                       |                                             |               |
| Field 5 | 10-Jun | 23     | Spirotetramat                   | Movento        | 87.6        | 23      | Spirotetramat                         | Movento                                     | 87.6          |
|         | 17-Jun | 23     | Spirotetramat                   | Movento        | 87.6        | 23      | Spirotetramat                         | Movento                                     | 87.6          |
|         |        |        |                                 |                |             |         |                                       |                                             |               |
|         |        |        |                                 |                |             | 1A + 3A | Methomyl +<br>Lambda-<br>cyhalothrin  | Lannate LV +<br>Warrior II w/<br>zeon tech. | 1008.6 + 34.6 |
|         | 23-Jun |        |                                 |                |             |         |                                       |                                             |               |
|         | 1-Jul  | 6      | Abamectin                       | Agri-Mek<br>SC | 21.4        | 6       | Abamectin                             | Agri-Mek SC                                 | 21.4          |
|         |        |        |                                 |                |             |         |                                       |                                             |               |
|         | 9-Jul  | 6      | Abamectin                       | Agri-Mek<br>SC | 21.4        | 6       | Abamectin                             | Agri-Mek SC                                 | 21.4          |
|         | 15-Jul | 28     | Cyantraniliprole                | Exirel         | 116.3       | 28      | Cyantraniliprole                      | Exirel                                      | 116.3         |
|         | 21-Jul |        |                                 |                |             | 28      | Cyantraniliprole                      | Exirel                                      | 116.3         |
|         |        |        |                                 |                |             |         |                                       |                                             |               |
|         | 30-Jul | 5      | Spinetoram                      | Radiant SC     | 87.6        | 5       | Spinetoram                            | Radiant SC                                  | 87.6          |
|         | 7-Aug  | 5      | Spinetoram                      | Radiant SC     | 87.6        | 5       | Spinetoram                            | Radiant SC                                  | 87.6          |
|         | 14-Aug | 5      | Spinetoram                      | Radiant SC     | 87.6        | 5       | Spinetoram                            | Radiant SC                                  | 87.6          |

|       |         |        |        |                                 |             |             |         |                                       |                                             |               |
|-------|---------|--------|--------|---------------------------------|-------------|-------------|---------|---------------------------------------|---------------------------------------------|---------------|
| Wayne | Field 6 | 25-Jun | 23     | Spirotetramat                   | Movento     | 87.6        | 23      | Spirotetramat                         | Movento                                     | 87.6          |
|       |         | 2-Jul  | 23     | Spirotetramat                   | Movento     | 87.6        | 23      | Spirotetramat                         | Movento                                     | 87.6          |
|       |         | 7-Jul  |        | ---                             |             |             | 1A + 3A | Methomyl +<br>Lambda-<br>cyhalothrin  | Lannate LV +<br>Warrior II w/<br>zeon tech. | 1008.6 + 34.6 |
|       |         |        |        | ---                             |             |             | 1A + 3A | Methomyl +<br>Lambda-<br>cyhalothrin  | Lannate LV +<br>Warrior II w/<br>zeon tech. | 1008.6 + 34.6 |
|       |         |        |        | ---                             |             |             | 6 + 3A  | Abamectin +<br>Lambda-<br>cyhalothrin | Agri-Mek SC +<br>Warrior II<br>w/zeon tech. | 21.4 + 35.0   |
|       |         | 22-Jul | 6 + 28 | Abamectin +<br>Cyantraniliprole | Minecto Pro | 14.7 + 69.3 | 6 + 28  | Abamectin +<br>Cyantraniliprole       | Minecto Pro                                 | 14.7 + 69.3   |
|       |         | 29-Jul |        |                                 |             |             |         |                                       |                                             |               |
|       |         | 4-Aug  |        |                                 |             |             | 5       | Spinetoram                            | Radiant SC                                  | 70.0          |
|       | Field 7 | 28-Jun | 23     | Spirotetramat                   | Movento     | 87.6        | 23      | Spirotetramat                         | Movento                                     | 87.6          |
|       |         | 6-Jul  | 23     | Spirotetramat                   | Movento     | 87.6        | 23      | Spirotetramat                         | Movento                                     | 87.6          |
|       |         | 14-Jul |        |                                 |             |             | 1A + 3A | Methomyl +<br>Lambda-<br>cyhalothrin  | Lannate LV +<br>Warrior II w/<br>zeon tech. | 1008.6 + 34.6 |
|       |         | 21-Jul |        |                                 |             |             | 1A + 3A | Methomyl +<br>Lambda-<br>cyhalothrin  | Lannate LV +<br>Warrior II w/<br>zeon tech. | 1008.6 + 34.6 |
|       |         | 28-Jul | 6 + 28 | Abamectin +<br>Cyantraniliprole | Minecto Pro | 14.7 + 69.3 | 6 + 28  | Abamectin +<br>Cyantraniliprole       | Minecto Pro                                 | 14.7 + 69.3   |
|       |         | 7-Aug  | 6 + 28 | Abamectin +<br>Cyantraniliprole | Minecto Pro | 14.7 + 69.3 | 6 + 28  | Abamectin +<br>Cyantraniliprole       | Minecto Pro                                 | 14.7 + 69.3   |
|       |         | 14-Aug |        | ---                             |             |             | 28      | Cyantraniliprole                      | Exirel                                      | 98.1          |

|         |        |        |                                 |             |             |         |                                      |                                             |               |
|---------|--------|--------|---------------------------------|-------------|-------------|---------|--------------------------------------|---------------------------------------------|---------------|
| Field 8 | 28-Jun | 23     | Spirotetramat                   | Movento     | 87.6        | 23      | Spirotetramat                        | Movento                                     | 87.6          |
|         | 6-Jul  | 23     | Spirotetramat                   | Movento     | 87.6        | 23      | Spirotetramat                        | Movento                                     | 87.6          |
|         | 14-Jul |        |                                 | ---         |             | 1A + 3A | Methomyl +<br>Lambda-<br>cyhalothrin | Lannate LV +<br>Warrior II w/<br>zeon tech. | 1008.6 + 34.6 |
|         | 21-Jul |        |                                 | ---         |             | 1A + 3A | Methomyl +<br>Lambda-<br>cyhalothrin | Lannate LV +<br>Warrior II w/<br>zeon tech. | 1008.6 + 34.6 |
|         | 28-Jul | 6 + 28 | Abamectin +<br>Cyantraniliprole | Minecto Pro | 14.7 + 69.3 | 6 + 28  | Abamectin +<br>Cyantraniliprole      | Minecto Pro                                 | 14.7 + 69.3   |
|         | 7-Aug  | 6 + 28 | Abamectin +<br>Cyantraniliprole | Minecto Pro | 14.7 + 69.3 | 6 + 28  | Abamectin +<br>Cyantraniliprole      | Minecto Pro                                 | 14.7 + 69.3   |
|         | 14-Aug |        |                                 | ---         |             | 28      | Cyantraniliprole                     | Exirel                                      | 98.1          |

If two products were applied concurrently as a tank mixture or bottled pre-mixture, both are listed and separated by a + symbol for each box.

**Table S5.** Summary ANOVA table of soil nutrient levels in the portions of all onion fields that received half and full application rates of N-P-K fertilizer compared with zero fertilizer applied in New York (USA) in 2019, 2020, and 2021.

| Year | Sample Date | Nutrient   | df    | F                |
|------|-------------|------------|-------|------------------|
| 2019 |             |            |       |                  |
|      | July        |            |       |                  |
|      |             | Nitrogen   | 2, 7  | 0.75             |
|      |             | Phosphorus | 2, 7  | 3.8 †            |
|      |             | Potassium  | 2, 7  | 1.18             |
| 2020 |             |            |       |                  |
|      | May         |            |       |                  |
|      |             | Nitrogen   | 2, 16 | <b>12.33***</b>  |
|      |             | Phosphorus | 2, 16 | 1.61             |
|      |             | Potassium  | 2, 16 | <b>9.23 **</b>   |
|      | July        |            |       |                  |
|      |             | Nitrogen   | 2, 16 | <b>8.46**</b>    |
|      |             | Phosphorus | 2, 16 | 0.65             |
|      |             | Potassium  | 2, 16 | <b>13.03 ***</b> |
| 2021 |             |            |       |                  |
|      | May         |            |       |                  |
|      |             | Nitrogen   | 2, 16 | <b>7.41 **</b>   |
|      |             | Phosphorus | 2, 16 | 1.83             |
|      |             | Potassium  | 2, 16 | <b>4.86 *</b>    |
|      | July        |            |       |                  |
|      |             | Nitrogen   | 2, 16 | <b>5.00 *</b>    |
|      |             | Phosphorus | 2, 16 | 2.11             |
|      |             | Potassium  | 2, 16 | <b>20.39 ***</b> |

Asterisks indicated significant differences at the 0.05 level (\*), 0.01 level (\*\*), or 0.001 level (\*\*\*). Values that approached significance (0.05-0.1) are denoted with (†). Random effect structure included the effects of field and sampling transect nested within field.



**Table S6.** Mean temperature and mean total precipitation in the two general regions where our study was conducted in New York (USA) in 2019, 2020, and 2021.

| County  | Month  | Temperature (C°) |      |      | Precipitation (mm) |       |       |
|---------|--------|------------------|------|------|--------------------|-------|-------|
|         |        | 2019             | 2020 | 2021 | 2019               | 2020  | 2021  |
| Orleans | April  | 6.8              | 5.4  | 7.9  | 82.3               | 95.3  | 110.7 |
|         | May    | 12.5             | 12.4 | 13.3 | 113.5              | 51.8  | 35.6  |
|         | June   | 18.1             | 19.8 | 20.9 | 94.7               | 54.1  | 70.1  |
|         | July   | 22.3             | 23.4 | 20.1 | 52.3               | 134.9 | 216.9 |
|         | August | 19.7             | 20.7 | 22.3 | 87.9               | 46.5  | 62.2  |
| Wayne   | April  | ---              | 5.7  | 8.4  | ---                | 44.5  | 65.5  |
|         | May    | ---              | 12.6 | 13.8 | ---                | 45.7  | 50.5  |
|         | June   | ---              | 19.7 | 21.1 | ---                | 15.2  | 86.1  |
|         | July   | ---              | 25.0 | 20.4 | ---                | 24.1  | 186.9 |
|         | August | ---              | 21.7 | 22.7 | ---                | 88.9  | 116.8 |

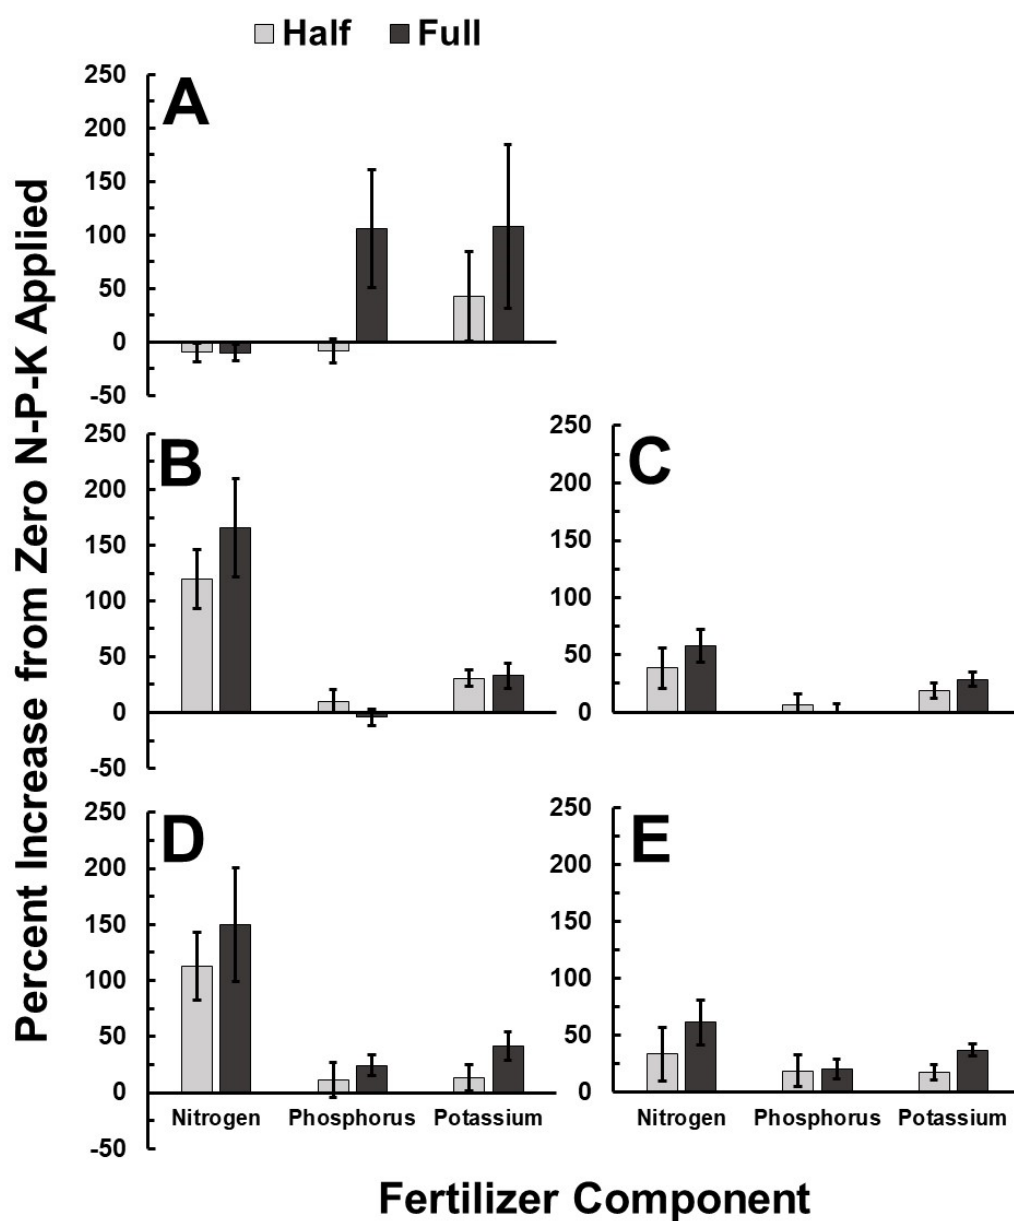

**Figure S1.** Nutrient levels from muck soil sampled in onion fields in July 2019 (A), May 2020 (B), July 2020 (C), May 2021 (D) and June 2021 (E) in New York (USA). Results are illustrated as the percent difference in nutrients from sample transects where no fertilizer was applied to those receiving either a half or full rate of N-P-K fertilizer applied. Error bars represent standard error. No significant differences were detected between half and full rates of fertilizer for any nutrient in this study (2019-2021).
